# Supplementary material for: Real-world treatment persistence in patients with rheumatoid arthritis initiating DMARDs in Germany—a health insurance claims data analysis
Source: Springer Nature journal article supplement (doi:10.1007/s00393-023-01323-8), 2023-02-09
Supplement: MOESM1 [file 24010536]

## Supplementary information

**Table S1** ICD-10-GM codes used to identify rheumatoid arthritis (inclusion criterion)\*

| Code | Code_Type | Group 1                                                                               | Group 2 |
|------|-----------|---------------------------------------------------------------------------------------|---------|
| M05  | ICD-10-GM | Seropositive chronic polyarthritis                                                    | RA      |
| M050 | ICD-10-GM | Felty's syndrome                                                                      | RA      |
| M051 | ICD-10-GM | Pulmonary manifestation of seropositive chronic polyarthritis                         | RA      |
| M052 | ICD-10-GM | Vasculitis in seropositive chronic polyarthritis                                      | RA      |
| M053 | ICD-10-GM | Seropositive chronic polyarthritis with involvement of other organs and organ systems | RA      |
| M058 | ICD-10-GM | Other sero-positive chronic polyarthritis                                             | RA      |
| M059 | ICD-10-GM | Seropositive chronic polyarthritis, unspecified                                       | RA      |
| M060 | ICD-10-GM | Seronegative chronic polyarthritis                                                    | RA      |
| M068 | ICD-10-GM | Other specified chronic rheumatoid arthritis                                          | RA      |
| M069 | ICD-10-GM | Chronic polyarthritis, unspecified                                                    | RA      |

\*Patients were required to have at least two RA diagnoses within 12 months (i.e., 4 quarters), with at least one of them coded by a certified rheumatologist. Rheumatologists were identified:

- a) in the outpatient setting using the two digits “31” representing the specialty “Rheumatologie/Innere Medizin” (rheumatology/internal medicine) of the lifelong physician number which is given to every physician by the statutory health insurance in Germany (Lebenslange Arztnummer – LANR) or
- b) in the inpatient setting by a rheumatological department stay.

ICD-10-GM, International Statistical Classification of Diseases and Related Health Problems, 10<sup>th</sup> revision, German Modification

**Table S2** OPS and ATC codes to identify DMARD (inclusion criterion)

| Group   | Class                   | Agent                      | OPS                 | ATC               |
|---------|-------------------------|----------------------------|---------------------|-------------------|
| csDMARD | --                      | Hydroxychloroquine sulfate | --                  | P01BA02           |
| csDMARD | --                      | Leflunomide                | --                  | L04AA13           |
| csDMARD | --                      | Methotrexate               | --                  | L04AX03 & M01CX01 |
| csDMARD | --                      | Sulfasalazine              | --                  | M01CX02           |
| bDMARD  | Anti-CD80/86            | Abatacept                  | 6-003.s0            | L04AA24           |
| bDMARD  | TNF- $\alpha$ inhibitor | Adalimumab                 | 6-001.d2 & 6-001.d3 | L04AB04           |
| bDMARD  | TNF- $\alpha$ inhibitor | Certolizumab pegol         | 6-005.7             | L04AB05           |
| bDMARD  | TNF- $\alpha$ inhibitor | Etanercept                 | 6-002.b1            | L04AB01           |
| bDMARD  | TNF- $\alpha$ inhibitor | Golimumab                  | 6-005.2             | L04AB06           |
| bDMARD  | TNF- $\alpha$ inhibitor | Infliximab                 | 6-001.e             | L04AB02           |
| bDMARD  | AntiCD20                | Rituximab                  | 6-001.h8            | L01XC02           |
| bDMARD  | Anti-IL-6               | Sarilumab                  | 6-00a.g             | L04AC14           |
| bDMARD  | Anti-IL-6               | Tocilizumab                | 6-005.m             | L04AC07           |
| tsDMARD | JAKi                    | Baricitinib                | --                  | L04AA37           |
| tsDMARD | JAKi                    | Tofacitinib                | --                  | L04AA29           |

ATC, Anatomical Therapeutic Classification; bDMARD, biologic disease-modifying anti-rheumatic drug; csDMARD, conventional synthetic disease-modifying anti-rheumatic drug; DMARD, disease-modifying anti-rheumatic drug; OPS, Operationen- und Prozedurenschlüssel

**Table S3** ICD-10-GM codes to identify pregnancy or autoimmune diseases other than rheumatoid arthritis (exclusion criterion)

| Code | Code_Type | Group 1                                                | Group 2                  | Group 3                  |
|------|-----------|--------------------------------------------------------|--------------------------|--------------------------|
| H20  | ICD-10-GM | Iridocyclitis                                          | non-infectious uveitis   | non-infectious uveitis   |
| H200 | ICD-10-GM | Acute and subacute iridocyclitits                      | non-infectious uveitis   | non-infectious uveitis   |
| H201 | ICD-10-GM | Chronic iridocyclitis                                  | non-infectious uveitis   | non-infectious uveitis   |
| H202 | ICD-10-GM | Phakogenic iridocyclitis                               | non-infectious uveitis   | non-infectious uveitis   |
| H208 | ICD-10-GM | Other iridocyclitis                                    | non-infectious uveitis   | non-infectious uveitis   |
| H209 | ICD-10-GM | Iridocyclitis, not specified                           | non-infectious uveitis   | non-infectious uveitis   |
| H302 | ICD-10-GM | Posterior cyclitis                                     | non-infectious uveitis   | non-infectious uveitis   |
| H308 | ICD-10-GM | Other chorioretinitis (incl. Harada's disease)         | non-infectious uveitis   | non-infectious uveitis   |
| H441 | ICD-10-GM | Other endophthalmitis                                  | non-infectious uveitis   | non-infectious uveitis   |
| K50  | ICD-10-GM | Crohn's disease [regional enteritis] [Crohn's disease] | Crohn's disease          | Autoimmune diseases      |
| K51  | ICD-10-GM | Ulcerative colitis                                     | Ulcerative colitis       | Autoimmune diseases      |
| K603 | ICD-10-GM | Anal fistula                                           | Anal fistula             | Autoimmune diseases      |
| L40  | ICD-10-GM | Psoriasis                                              | Psoriasis                | Autoimmune diseases      |
| L400 | ICD-10-GM | Psoriasis vulgaris                                     | Psoriasis                | Autoimmune diseases      |
| L401 | ICD-10-GM | Generalized psoriasis pustulosa                        | Psoriasis                | Autoimmune diseases      |
| L402 | ICD-10-GM | Acrodermatitis continua suppurativa                    | Psoriasis                | Autoimmune diseases      |
| L403 | ICD-10-GM | Psoriasis pustulosa palmoplantaris                     | Psoriasis                | Autoimmune diseases      |
| L404 | ICD-10-GM | Psoriasis guttata                                      | Psoriasis                | Autoimmune diseases      |
| L405 | ICD-10-GM | Psoriatic arthropathy                                  | Psoriatic arthritis      | Autoimmune diseases      |
| L408 | ICD-10-GM | Other psoriasis                                        | Psoriasis                | Autoimmune diseases      |
| L409 | ICD-10-GM | Psoriasis, unspecified                                 | Psoriasis                | Autoimmune diseases      |
| L732 | ICD-10-GM | Hidradenitis suppurativa                               | Hidradenitis suppurativa | Hidradenitis suppurativa |
| L93  | ICD-10-GM | Lupus erythematosus                                    | Lupus                    | Autoimmune diseases      |
| M070 | ICD-10-GM | Distal interphalangeal psoriatic arthritis             | Psoriatic arthritis      | Autoimmune diseases      |
| M071 | ICD-10-GM | Arthritis mutilans                                     | Psoriatic arthritis      | Autoimmune diseases      |
| M072 | ICD-10-GM | Psoriatica spondylitis                                 | Psoriatic arthritis      | Autoimmune diseases      |
| M073 | ICD-10-GM | Other psoriatic arthritis                              | Psoriatic arthritis      | Autoimmune diseases      |
| M08  | ICD-10-GM | Juvenile arthritis                                     | Juvenile arthritis       | Autoimmune diseases      |
| M090 | ICD-10-GM | Juvenile arthritis in psoriasis                        | Psoriatic arthritis      | Autoimmune diseases      |

|      |           |                                                                                                      |                        |                     |
|------|-----------|------------------------------------------------------------------------------------------------------|------------------------|---------------------|
| M321 | ICD-10-GM | Systemic lupus erythematosus w organ or system involvement                                           | Lupus                  | Autoimmune diseases |
| M328 | ICD-10-GM | Other forms of systemic lupus erythematosus                                                          | Lupus                  | Autoimmune diseases |
| M329 | ICD-10-GM | Systemic lupus erythematosus, unspecified                                                            | Lupus                  | Autoimmune diseases |
| M45  | ICD-10-GM | Ankylosing spondylitis                                                                               | Ankylosing spondylitis | Autoimmune diseases |
| M450 | ICD-10-GM | Ankylosing spondylitis                                                                               | Ankylosing spondylitis | Autoimmune diseases |
| O09  | ICD-10-GM | duration of pregnancy                                                                                | Pregnancy              | Pregnancy           |
| O10  | ICD-10-GM | Pre-existing hypertension that complicates pregnancy, birth and puerperium                           | Pregnancy              | Pregnancy           |
| O11  | ICD-10-GM | Chronic hypertension with grafted preeclampsia                                                       | Pregnancy              | Pregnancy           |
| O12  | ICD-10-GM | Gestational edema and gestational proteinuria [pregnancy-induced] without hypertension               | Pregnancy              | Pregnancy           |
| O13  | ICD-10-GM | Gestational hypertension [pregnancy-induced hypertension]                                            | Pregnancy              | Pregnancy           |
| O14  | ICD-10-GM | pre-eclampsia                                                                                        | Pregnancy              | Pregnancy           |
| O15  | ICD-10-GM | eclampsia                                                                                            | Pregnancy              | Pregnancy           |
| O16  | ICD-10-GM | Unspecified hypertension of the mother                                                               | Pregnancy              | Pregnancy           |
| O20  | ICD-10-GM | Bleeding in early pregnancy                                                                          | Pregnancy              | Pregnancy           |
| O21  | ICD-10-GM | Excessive vomiting during pregnancy                                                                  | Pregnancy              | Pregnancy           |
| O22  | ICD-10-GM | Venous diseases and hemorrhoids as complications in pregnancy                                        | Pregnancy              | Pregnancy           |
| O23  | ICD-10-GM | Infections of the genitourinary tract in pregnancy                                                   | Pregnancy              | Pregnancy           |
| O24  | ICD-10-GM | Diabetes mellitus in pregnancy                                                                       | Pregnancy              | Pregnancy           |
| O25  | ICD-10-GM | Malnutrition in pregnancy                                                                            | Pregnancy              | Pregnancy           |
| O26  | ICD-10-GM | Care of the mother in other conditions, which are mainly associated with the pregnancy               | Pregnancy              | Pregnancy           |
| O28  | ICD-10-GM | Abnormal findings in the screening of the mother for prenatal diagnosis                              | Pregnancy              | Pregnancy           |
| O29  | ICD-10-GM | Complications of anesthesia during pregnancy                                                         | Pregnancy              | Pregnancy           |
| O30  | ICD-10-GM | Multiple pregnancy                                                                                   | Pregnancy              | Pregnancy           |
| O31  | ICD-10-GM | Complications specific to a multiple pregnancy                                                       | Pregnancy              | Pregnancy           |
| O32  | ICD-10-GM | Care of the mother in case of established or suspected abnormal position and adjustment of the fetus | Pregnancy              | Pregnancy           |
| O33  | ICD-10-GM | Care of the mother in case of established or assumed mismatch between fetus and pelvis               | Pregnancy              | Pregnancy           |

|     |           |                                                                                             |           |           |
|-----|-----------|---------------------------------------------------------------------------------------------|-----------|-----------|
| O34 | ICD-10-GM | Care of the mother in case of established or suspected anomaly of the pelvic organs         | Pregnancy | Pregnancy |
| O35 | ICD-10-GM | Care of the mother in case of established or suspected anomaly or damage to the fetus       | Pregnancy | Pregnancy |
| O36 | ICD-10-GM | Care of the mother for other identified or suspected complications in the fetus             | Pregnancy | Pregnancy |
| O40 | ICD-10-GM | polyhydramnios                                                                              | Pregnancy | Pregnancy |
| O41 | ICD-10-GM | Other changes of the amniotic fluid and the membranes                                       | Pregnancy | Pregnancy |
| O42 | ICD-10-GM | Premature rupture of membranes                                                              | Pregnancy | Pregnancy |
| O43 | ICD-10-GM | Pathological states of the placenta                                                         | Pregnancy | Pregnancy |
| O44 | ICD-10-GM | Placenta previa                                                                             | Pregnancy | Pregnancy |
| O45 | ICD-10-GM | Premature placental abruption [Abruptio placentae]                                          | Pregnancy | Pregnancy |
| O46 | ICD-10-GM | Prepartial bleeding, not elsewhere classified                                               | Pregnancy | Pregnancy |
| O47 | ICD-10-GM | Frustrane Contractions [useless labor pain]                                                 | Pregnancy | Pregnancy |
| O48 | ICD-10-GM | Prolonged pregnancy                                                                         | Pregnancy | Pregnancy |
| O60 | ICD-10-GM | Premature labor and delivery                                                                | Pregnancy | Pregnancy |
| O61 | ICD-10-GM | Failed induction of labor                                                                   | Pregnancy | Pregnancy |
| O62 | ICD-10-GM | Abnormal labor activity                                                                     | Pregnancy | Pregnancy |
| O63 | ICD-10-GM | Protracted birth                                                                            | Pregnancy | Pregnancy |
| O64 | ICD-10-GM | Birth obstacle due to position, posture and adjustment abnormalities of the fetus           | Pregnancy | Pregnancy |
| O65 | ICD-10-GM | Obstacle due to abnormality of the maternal pelvis                                          | Pregnancy | Pregnancy |
| O66 | ICD-10-GM | Other obstacle during childbirth                                                            | Pregnancy | Pregnancy |
| O67 | ICD-10-GM | Complications of labor and delivery due to intrapartum hemorrhage, not elsewhere classified | Pregnancy | Pregnancy |
| O68 | ICD-10-GM | Complications of labor and delivery due to fetal distress [fetal distress]                  | Pregnancy | Pregnancy |
| O69 | ICD-10-GM | Complications during labor and delivery due to umbilical cord complications                 | Pregnancy | Pregnancy |
| O70 | ICD-10-GM | Dam rupture during delivery                                                                 | Pregnancy | Pregnancy |
| O71 | ICD-10-GM | Other injuries during childbirth                                                            | Pregnancy | Pregnancy |
| O72 | ICD-10-GM | Postpartum hemorrhage                                                                       | Pregnancy | Pregnancy |
| O73 | ICD-10-GM | Retention of the placenta and the membranes without bleeding                                | Pregnancy | Pregnancy |
| O74 | ICD-10-GM | Complications of anesthesia during labor and childbirth                                     | Pregnancy | Pregnancy |

|     |           |                                                                                                                                                   |           |           |
|-----|-----------|---------------------------------------------------------------------------------------------------------------------------------------------------|-----------|-----------|
| O75 | ICD-10-GM | Other complications of labor and delivery, not elsewhere classified                                                                               | Pregnancy | Pregnancy |
| O80 | ICD-10-GM | Spontaneous delivery of a singleton                                                                                                               | Pregnancy | Pregnancy |
| O81 | ICD-10-GM | Birth of a singleton by forceps or vacuum extraction                                                                                              | Pregnancy | Pregnancy |
| O82 | ICD-10-GM | Birth of a singleton with caesarean section                                                                                                       | Pregnancy | Pregnancy |
| O85 | ICD-10-GM | puerperal fever                                                                                                                                   | Pregnancy | Pregnancy |
| O86 | ICD-10-GM | Other puerperal infections                                                                                                                        | Pregnancy | Pregnancy |
| O87 | ICD-10-GM | Venous diseases and hemorrhoids as complications in the puerperium                                                                                | Pregnancy | Pregnancy |
| O88 | ICD-10-GM | Embolism during the gestation period                                                                                                              | Pregnancy | Pregnancy |
| O89 | ICD-10-GM | Complications of anesthesia in the puerperium                                                                                                     | Pregnancy | Pregnancy |
| O90 | ICD-10-GM | Puerperal complications, not elsewhere classified                                                                                                 | Pregnancy | Pregnancy |
| O91 | ICD-10-GM | Infections of the breast [mammary gland] in connection with gestation                                                                             | Pregnancy | Pregnancy |
| O92 | ICD-10-GM | Other diseases of the breast [mammary gland] associated with gestation and lactation disorders                                                    | Pregnancy | Pregnancy |
| O94 | ICD-10-GM | Consequences of complications during pregnancy, childbirth and puerperium                                                                         | Pregnancy | Pregnancy |
| O95 | ICD-10-GM | Death during gestation period unspecified cause                                                                                                   | Pregnancy | Pregnancy |
| O96 | ICD-10-GM | Death as a result of any gestational cause after more than 42 days to less than one year after delivery                                           | Pregnancy | Pregnancy |
| O97 | ICD-10-GM | Death due to the causes of gestation                                                                                                              | Pregnancy | Pregnancy |
| O98 | ICD-10-GM | Infectious and parasitic diseases of the mother, which can be classified elsewhere, but which complicate pregnancy, childbirth and the puerperium | Pregnancy | Pregnancy |
| O99 | ICD-10-GM | Other maternal diseases that can be classified elsewhere, but which complicate pregnancy, childbirth and the puerperium                           | Pregnancy | Pregnancy |

ICD-10-GM, International Statistical Classification of Diseases and Related Health Problems, 10<sup>th</sup> revision, German Modification

**Table S4** Diseases of the circulatory system at baseline occurring in  $\geq 5\%$  of a treatment group

|                                                                                      | Prior csDMARD          |      |                                              |      |                               |      |                                  |      |                                    |      | Prior bDMARD          |      |                                             |      |                               |      |                                  |      |                                    |      |
|--------------------------------------------------------------------------------------|------------------------|------|----------------------------------------------|------|-------------------------------|------|----------------------------------|------|------------------------------------|------|-----------------------|------|---------------------------------------------|------|-------------------------------|------|----------------------------------|------|------------------------------------|------|
|                                                                                      | csDMARD class<br>n=232 |      | TNF- $\alpha$ inhibitor index class<br>n=433 |      | Anti-IL-6 index class<br>n=46 |      | Anti-CD80/86 index class<br>n=37 |      | JAK inhibitor index class<br>n=235 |      | csDMARD class<br>n=10 |      | TNF- $\alpha$ inhibitor index class<br>n=52 |      | Anti-IL-6 index class<br>n=13 |      | Anti-CD80/86 index class<br>n=12 |      | JAK inhibitor index class<br>n=285 |      |
|                                                                                      | n                      | %    | n                                            | %    | n                             | %    | n                                | %    | n                                  | %    | n                     | %    | n                                           | %    | n                             | %    | n                                | %    | n                                  | %    |
| Essential (primary) hypertension                                                     | 120                    | 51.7 | 217                                          | 50.1 | 28                            | 60.9 | 28                               | 75.7 | 130                                | 55.3 | 7                     | 70.0 | 22                                          | 42.3 | 9                             | 69.2 | 10                               | 83.3 | 168                                | 58.9 |
| Varicose veins of lower extremities                                                  | 47                     | 20.3 | 60                                           | 13.9 | 0                             | 0.0  | 8                                | 21.6 | 41                                 | 17.4 | 0                     | 0.0  | 6                                           | 11.5 | 0                             | 0.0  | 0                                | 0.0  | 36                                 | 12.6 |
| Chronic ischaemic heart disease                                                      | 30                     | 12.9 | 37                                           | 8.5  | 0                             | 0.0  | 12                               | 32.4 | 33                                 | 14.0 | 0                     | 0.0  | 0                                           | 0.0  | 0                             | 0.0  | 0                                | 0.0  | 42                                 | 14.7 |
| Atherosclerosis                                                                      | 20                     | 8.6  | 29                                           | 6.7  | 0                             | 0.0  | 0                                | 0.0  | 21                                 | 8.9  | 0                     | 0.0  | 6                                           | 11.5 | 0                             | 0.0  | 0                                | 0.0  | 25                                 | 8.8  |
| Other cardiac arrhythmias                                                            | 16                     | 6.9  | 35                                           | 8.1  | 0                             | 0.0  | 0                                | 0.0  | 21                                 | 8.9  | 0                     | 0.0  | 7                                           | 13.5 | 0                             | 0.0  | 0                                | 0.0  | 22                                 | 7.7  |
| Hypertensive heart disease                                                           | 16                     | 6.9  | 24                                           | 5.5  | 0                             | 0.0  | 6                                | 16.2 | 18                                 | 7.7  | 0                     | 0.0  | 6                                           | 11.5 | 0                             | 0.0  | 0                                | 0.0  | 24                                 | 8.4  |
| Heart failure                                                                        | 22                     | 9.5  | 24                                           | 5.5  | 0                             | 0.0  | 7                                | 18.9 | 24                                 | 10.2 | 0                     | 0.0  | 0                                           | 0.0  | 0                             | 0.0  | 0                                | 0.0  | 25                                 | 8.8  |
| Atrial fibrillation and flutter                                                      | 12                     | 5.2  | 22                                           | 5.1  | 0                             | 0.0  | 6                                | 16.2 | 19                                 | 8.1  | 0                     | 0.0  | 0                                           | 0.0  | 0                             | 0.0  | 0                                | 0.0  | 19                                 | 6.7  |
| Other disorders of veins                                                             | 19                     | 8.2  | 29                                           | 6.7  | 0                             | 0.0  | 0                                | 0.0  | 16                                 | 6.8  | 0                     | 0.0  | 0                                           | 0.0  | 0                             | 0.0  | 0                                | 0.0  | 22                                 | 7.7  |
| Nonrheumatic mitral valve disorders                                                  | 10                     | 4.3  | 19                                           | 4.4  | 0                             | 0.0  | 0                                | 0.0  | 11                                 | 4.7  | 0                     | 0.0  | 0                                           | 0.0  | 0                             | 0.0  | 0                                | 0.0  | 18                                 | 6.3  |
| Other cerebrovascular diseases                                                       | 14                     | 6.0  | 11                                           | 2.5  | 0                             | 0.0  | 0                                | 0.0  | 8                                  | 3.4  | 0                     | 0.0  | 0                                           | 0.0  | 0                             | 0.0  | 0                                | 0.0  | 13                                 | 4.6  |
| Occlusion and stenosis of precerebral arteries, not resulting in cerebral infarction | 11                     | 4.7  | 17                                           | 3.9  | 0                             | 0.0  | 0                                | 0.0  | 9                                  | 3.8  | 0                     | 0.0  | 0                                           | 0.0  | 0                             | 0.0  | 0                                | 0.0  | 15                                 | 5.3  |

|                                    |    |     |    |     |   |     |   |     |    |     |   |     |   |     |   |     |   |     |    |     |
|------------------------------------|----|-----|----|-----|---|-----|---|-----|----|-----|---|-----|---|-----|---|-----|---|-----|----|-----|
| Other peripheral vascular diseases | 10 | 4.3 | 23 | 5.3 | 0 | 0.0 | 0 | 0.0 | 12 | 5.1 | 0 | 0.0 | 0 | 0.0 | 0 | 0.0 | 0 | 0.0 | 12 | 4.2 |
| Phlebitis and thrombophlebitis     | 10 | 4.3 | 11 | 2.5 | 0 | 0.0 | 0 | 0.0 | 7  | 3.0 | 0 | 0.0 | 0 | 0.0 | 0 | 0.0 | 0 | 0.0 | 15 | 5.3 |

bDMARD, biologic disease-modifying anti-rheumatic drug; CD, cluster of differentiation; csDMARD, conventional synthetic disease-modifying anti-rheumatic

drug; IL, interleukin; JAK, Janus kinase; TNF, tumour necrosis factor



**Fig. S1** Study design

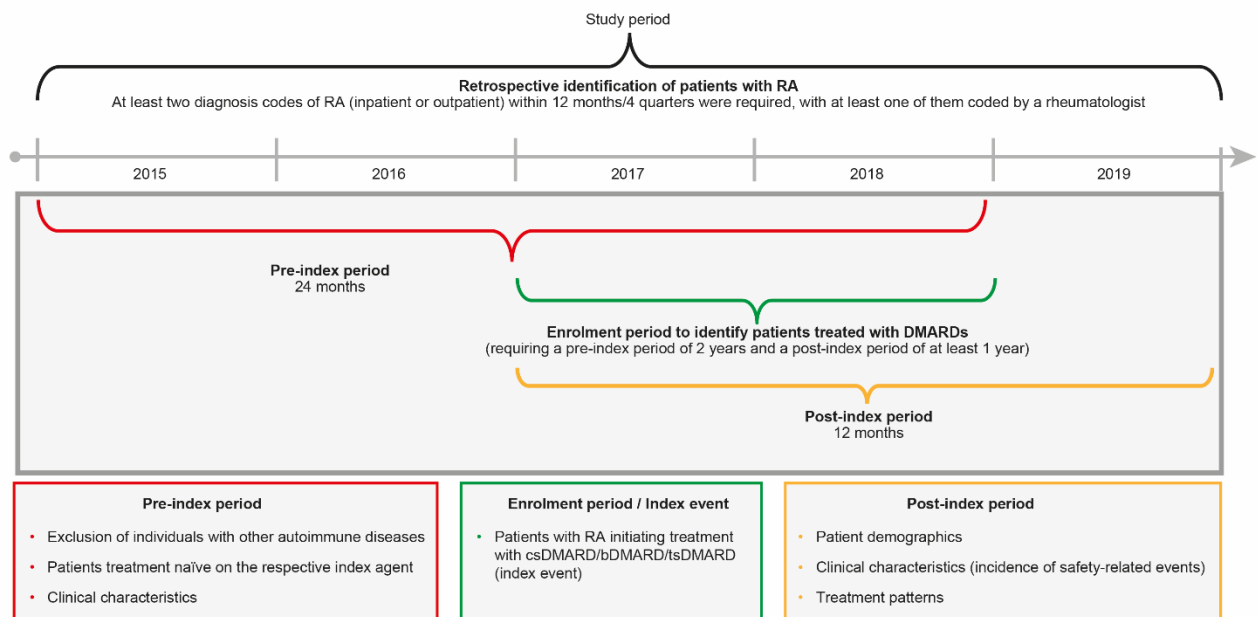

bDMARD, biologic disease-modifying anti-rheumatic drug; csDMARD, conventional synthetic disease-modifying anti-rheumatic drug; RA, rheumatoid arthritis; tsDMARD, targeted synthetic disease-modifying anti-rheumatic drug

**Fig. S2** Prevalence of specific comorbidities in the 12-month pre-index period

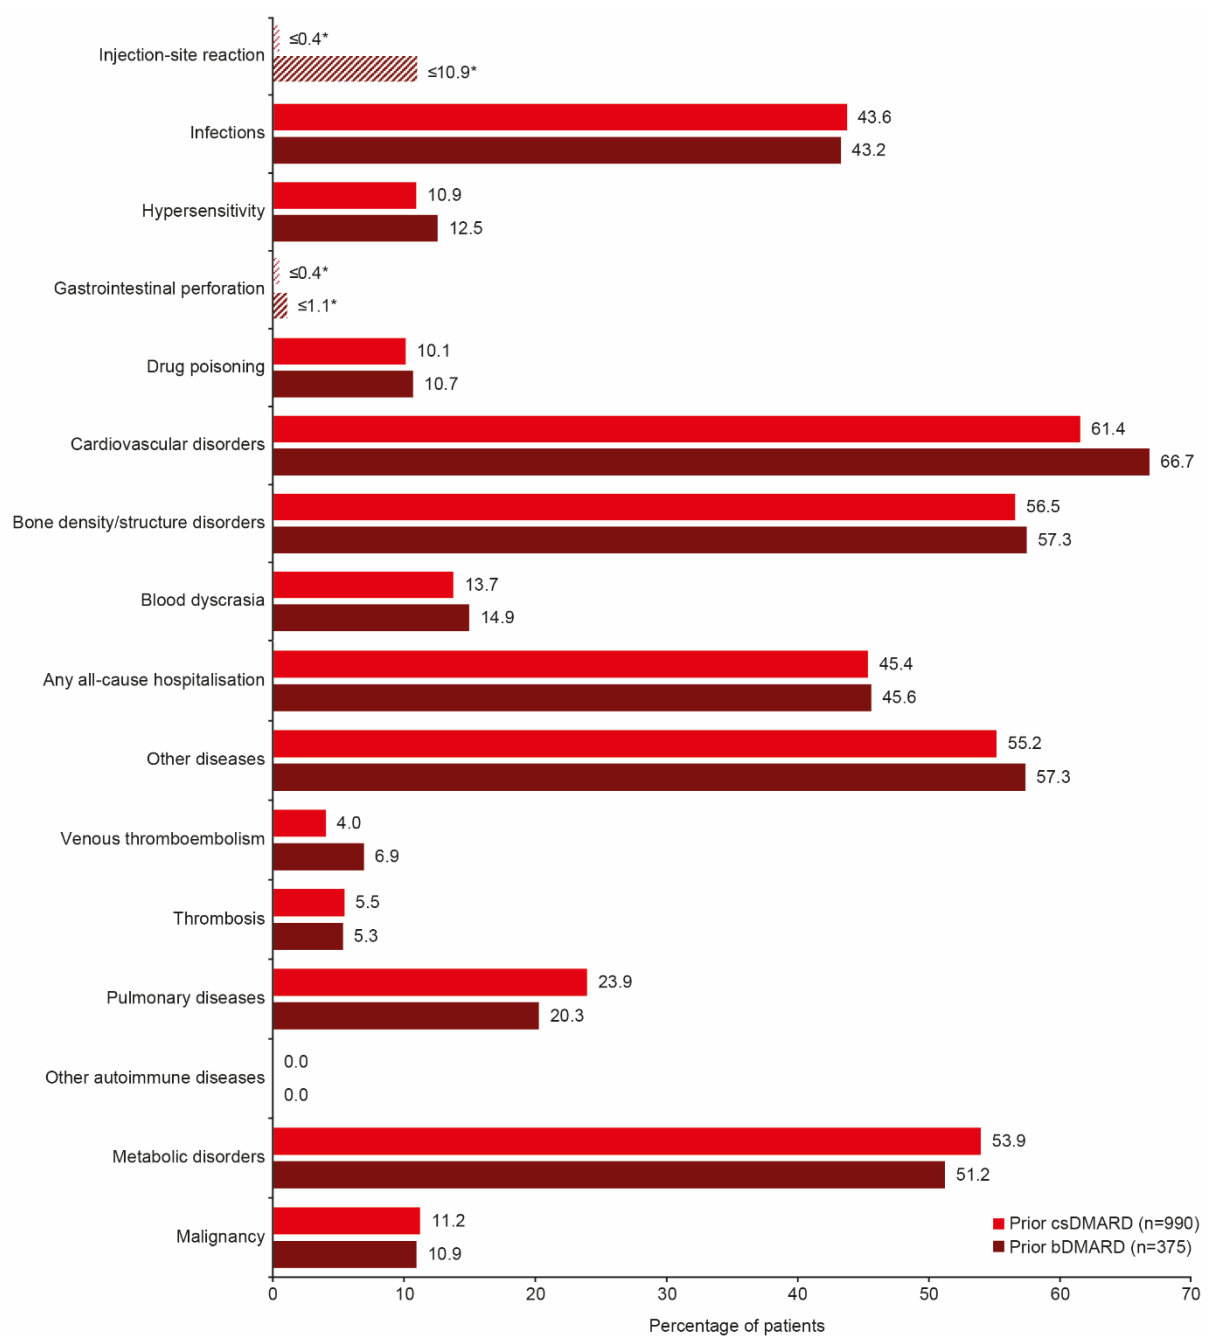

\*The subgroups shown as hatched bars comprised samples where  $n < 5$ , which could not be reported due to data protection regulations; therefore, the percentages could only be estimated.

bDMARD, biologic disease-modifying anti-rheumatic drug; csDMARD, conventional synthetic disease-modifying anti-rheumatic drug; IR, inadequate response
